# Supplementary material for: Temporal Dynamics of the Ruminant Type I IFN-Induced Antiviral State against Homologous Parainfluenza Virus 3 Challenge In Vitro
Source: MDPI journal article supplement (doi:10.3390/v14051025), 2022-05-11
Supplement: s1 [file s1]

## Supplementary Materials

**Figure S1** Goat IFN- $\alpha$ -induced genes in MDBK cells assessed by qPCR.

**Table S1** qPCR primers used in this study

**Table S2** ISG screen data sets. The table shows complete data sets from ISG screens for goat IFN- $\alpha$  incubation in MDBK cells.

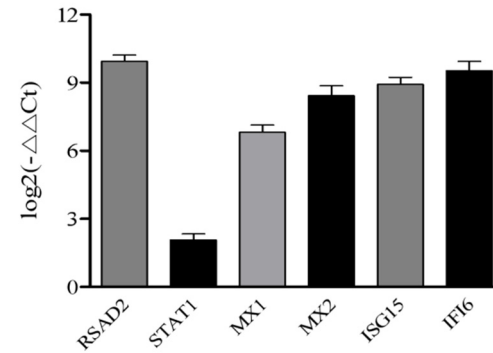

**Figure S1.** Goat IFN- $\alpha$ -induced genes in MDBK cells assessed by qPCR. MDBK cells were incubated with 1  $\mu$ g/mL of goat IFN- $\alpha$  for 24 hours, and the untreated cells were used as the negative control. Total cell RNA was extracted, and the mRNA levels were assessed by qPCR. Two independent experiments were performed, and relative quantities of mRNA accumulation were evaluated based on the  $2^{-\Delta\Delta C_t}$  method.

Table S1: qPCR primers used in this study.

| Gene name                                            | Forward primer (5'-3')                | Reverse primer (5'-3')   | Reference  |
|------------------------------------------------------|---------------------------------------|--------------------------|------------|
| <b>RT-qPCR</b>                                       |                                       |                          |            |
| IFNA1                                                | GTGAGGAAATACTTCCACAGACTCACT           | TGAGGAAGAGAAGGCTCTCATGA  | [38]       |
| IFNB1                                                | CAGATGCCTGAGGAGATGAAG                 | CTGGTGAGAATGCCGAAGAT     | This study |
| RSAD2                                                | TTCAACGTGGACGAGGATATG                 | CCAGAGTTCTCACCCCTCAATTAT | [18]       |
| STAT1                                                | TTTCCGTTCTGGCTTTGGA                   | GCTCTCGCTCCTTGCTAATAA    | This study |
| MX1                                                  | GCCAACTAGTCAGCACTACATTGTC             | GCTCTTGGACTCCATATCTTCAC  | [32]       |
| MX2                                                  | CTTCAGAGACGCCTCAGTCG                  | TGAAGCAGCCAGCAATAGTG     | [32]       |
| ISG15                                                | GGTATCCGAGCTGAAGCAGTT                 | ACCTCCCTGCTGTCAAGGT      | [32]       |
| IFI6                                                 | GTGACAAAGCCTTGAGCTGC                  | CGCAGGTGTAGAGTAGCAGG     | [32]       |
| $\beta$ -Actin                                       | ACATCCGCAAGGACCTCTA                   | GATCTCTTTCTGCATCCTGTCC   |            |
| <b>TaqMan RT-qPCR for detecting CPIV3 RNA copies</b> |                                       |                          |            |
| Primers                                              | GCTTGGCTTCTTTGAAATGG                  | GCCTGCAGAAGTTCCTTGTC     | [22]       |
| Probe                                                | FAM-CAATCGGACTAGCCAAGTATGGTGGGA-TAMRA |                          |            |

Table S2: ISG screen data sets. The table shows complete data sets from ISG screens for gIFN- $\alpha$  incubation in MDBK cells.

| Gene-ID   | Symbol  | log2(fc) | Gene-ID | Symbol | log2(fc) | Gene-ID   | Symbol | log2(fc) | Gene-ID   | Symbol    | log2(fc) |
|-----------|---------|----------|---------|--------|----------|-----------|--------|----------|-----------|-----------|----------|
| 100139670 | IFIT1   | 8.57     | 515202  | USP18  | 6.05     | 509678    | IFIT3  | 5.8      | 281574    | EZR       | 1.09     |
| 112441507 | Bst2    | 7.49     | 517587  | INHBE  | 3.09     | 507055    | GBP4   | 6.72     | 507526    | CDH17     | 1.09     |
| 280729    | B2M     | 1.51     | 527520  | HERC6  | 4.87     | 777788    | DDIT3  | 2.15     | 533630    | PSPH      | 1.84     |
| 280872    | MX1     | 6.5      | 527528  | IFIT2  | 4.91     | 613313    | GBP2   | 6.06     | 281871    | ISG15     | 9.24     |
| 280873    | MX2     | 8.87     | 535490  | IFIH1  | 3.49     | 513185    | PARP12 | 2.01     | 509107    | ATF4      | 1.04     |
| 281576    | WARS    | 3.17     | 539807  | ZNFX1  | 3.13     | 783680    | B2M    | 1.50     | 112441484 | IFITM3    | 1.85     |
| 282255    | IFITM3  | 2.96     | 540789  | PARP14 | 2.41     | 533044    | PSAT1  | 1.71     | 511531    | GBP3      | 3.94     |
| 347700    | EIF2AK2 | 2.95     | 654488  | OAS1Y  | 9.04     | 101904063 | ITGAX  | 2.57     | 532684    | LOXL2     | 1.42     |
| 497204    | UBA7    | 4.70     | 784304  | CMPK2  | 6.37     | 524576    | APOL2  | 2.63     | 617420    | ISG12(B)  | 1.99     |
| 504760    | DDX58   | 3.96     | 510814  | STAT1  | 1.81     | 617807    | PSMF1  | 2.16     | 510933    | Aars      | 1.35     |
| 505134    | ADAR    | 2.32     | 509740  | XAF1   | 4.53     | 281408    | PLAU   | 1.28     | 511858    | NT5C3A    | 1.78     |
| 506759    | IFI16   | 5.55     | 415113  | HSPA5  | 1.42     | 100298356 | Bst2   | 6.99     | 327662    | ANXA1     | 1.20     |
| 508333    | ZBP1    | 6.30     | 777594  | IFITM3 | 2.21     | 508877    | PNPT1  | 2.06     | 513605    | GTPBP2    | 2.19     |
| 509283    | RNF213  | 3.46     | 781914  | CMTR2  | 2.43     | 281476    | SARS   | 1.55     | 508861    | SAT1      | 1.036    |
| 509859    | TRANK1  | 2.25     | 515712  | HLA-A  | 1.67     | 347699    | OAS1X  | 9.20     | 100125591 | IRF7      | 2.2      |
| 510532    | PARP9   | 2.41     | 506415  | RSAD2  | 9.67     | 282355    | SLC1A5 | 1.97     | 338039    | CASP13    | 1.53     |
| 512486    | GBP3    | 4.23     | 510377  | SP140  | 2.42     | 100297676 | Clec2h | 2.03     | 782274    | TNFRSF10A | 1.17     |
| 512913    | IFI6    | 4.14     | 505103  | PHGDH  | 2.11     | 505265    | TRIM5  | 1.24     | 614589    | ZC3HAV1   | 1.27     |
| 514205    | SAMD9   | 6.31     | 408010  | GARS   | 1.63     | 521795    | SLFN11 | 1.25     | 525795    | AGRN      | 1.16     |
| 514373    | HERC5   | 5.22     | 514896  | TRIM56 | 1.43     | 533038    | TM4SF1 | 1.14     | 513572    | ERAP2     | 1.61     |
| 515051    | DTX3L   | 2.99     | 510991  | PARP10 | 2.51     | 524959    | TAP1   | 2.02     | 514209    | ASNS      | 1.77     |
| 281528    | TGM2    | 1.94     | 532442  | RTP4   | 3.51     | 539159    | CTH    | 2.55     | 509855    | IRF9      | 2.19     |
| 515091    | IFIT5   | 2.07     | 614555  | Epsti1 | 3.8      | 508378    | DHX58  | 6.89     | 514386    | BIRC3     | 1.49     |

| Gene-ID   | Symbol   | log2(fc) | Gene-ID   | Symbol      | log2(fc) | Gene-ID | Symbol  | log2(fc) | Gene-ID   | Symbol   | log2(fc) |
|-----------|----------|----------|-----------|-------------|----------|---------|---------|----------|-----------|----------|----------|
| 533049    | HLA-A    | 1.21     | 539820    | TRIM34      | 1.73     | 509863  | SESN2   | 2.08     | 533992    | DRAM1    | 1.09     |
| 280701    | PPA1     | 1.35     | 512531    | MARS        | 1.03     | 282077  | SPARC   | 1.49     | 512672    | Patr-A   | 1.43     |
| 517417    | XRN2     | 1.20     | 506029    | STRADB      | 1.23     | 512184  | CDADC1  | 1.22     | 282013    | PSMB8    | 1.103    |
| 407173    | HLA-A    | 2.00     | 104973909 | ERVPA1BLB-1 | 2.12     | 616948  | TRIM5   | 1.51     | 507781    | NEDD4    | 1.04     |
| 513281    | CPM      | 1.63     | 516864    | ALDH1L2     | 2.26     | 506604  | ISG20   | 2.93     | 518469    | GPCPD1   | 1.51     |
| 515204    | SP110    | 2.16     | 513479    | RNF114      | 1.23     | 616168  | ICAM5   | 1.01     | 282711    | EPAS1    | 2.15     |
| 538519    | MKNK2    | 1.49     | 614776    | POLR2K      | 1.25     | 524683  | SAMHD1  | 1.17     | 507138    | IFI27    | 9.93     |
| 100125267 | LIPA     | 1.31     | 618042    | VGF         | 2.42     | 513220  | MKI67   | 1.24     | 539781    | Chmp5    | 1.01     |
| 514739    | MAP1B    | 1.16     | 507215    | TNFSF10     | 6.04     | 790880  | ATXN3   | 1.08     | 100139208 | SP140L   | 2.28     |
| 511023    | STAT2    | 1.19     | 282295    | HYOU1       | 1.10     | 524531  | USP25   | 1.25     | 510593    | PSMB9    | 2.86     |
| 282856    | PCK2     | 1.79     | 505940    | ARHGEF2     | 1.16     | 539141  | PSMA2   | 1.06     | 617530    | CEBPG    | 1.10     |
| 509620    | CMTR1    | 1.42     | 280981    | PLIN2       | 1.56     | 513231  | GTF2B   | 2.19     | 614242    | RAB8B    | 1.22     |
| 517535    | HSPA9    | 1.02     | 540584    | FAM126A     | 1.30     | 281581  | YARS    | 1.10     | 100137953 | ATP8B4   | 6.34     |
| 100138545 | PML      | 1.23     | 508269    | TMEM106A    | 3.37     | 507197  | SHMT2   | 1.04     | 530999    | Clstn2   | 1.18     |
| 508347    | IFI44L   | 9.27     | 524078    | Slc7a11     | 2.26     | 510813  | LGALS9  | 7.50     | 100337295 | IL11     | 1.47     |
| 616886    | IGFBPL1  | 1.40     | 508348    | IFI44       | 9.30     | 514787  | STK38L  | 1.41     | 504507    | TNFSF13B | 1.01     |
| 510417    | HLA-A    | 1.76     | 614655    | DESI1       | 1.08     | 515475  | TMEM140 | 2.63     | 513308    | ULBP1    | 1.41     |
| 506045    | ATAD1    | 1.20     | 617047    | TCIM        | 2.43     | 615833  | IFITM1  | 1.69     | 508638    | NOC2L    | 1.07     |
| 280686    | F3       | 1.47     | 101902412 | ANGPTL8     | 2.87     | 532944  | LHFPL6  | 1.50     | 614093    | PXK      | 1.07     |
| 531137    | LGALS3BP | 1.02     | 539867    | SYT4        | 1.57     | 533050  | HLA-A   | 1.13     | 522469    | BATF2    | 4.32     |
| 359715    | TRIM21   | 1.48     | 507107    | SLC3A2      | 1.26     | 515715  | Cars    | 1.13     | 787569    | LARP6    | 1.09     |
| 538465    | TRIB3    | 2.32     | 510807    | NFE2L3      | 1.05     | 541283  | IFRD1   | 1.28     | 781648    | LAP3     | 1.14     |
| 326577    | SLC1A4   | 1.72     | 510748    | PLEKHA4     | 2.27     | 539087  | RYDEN   | 1.33     | 100336669 | GBP7     | 5.09     |
| 511328    | B4GALT4  | 1.74     | 614497    | AKAP2       | 1.06     | 512633  | MFSD2A  | 1.4      | 504336    | DAXX     | 1.17     |
| 520472    | NAMPT    | 1.33     | 517539    | MTHFD2      | 1.82     | 538691  | HS3ST1  | 2.83     | 529235    | DDIT4    | 1.15     |

| Gene-ID   | Symbol   | log2(fc) | Gene-ID   | Symbol   | log2(fc) | Gene-ID   | Symbol    | log2(fc) | Gene-ID   | Symbol    | log2(fc) |
|-----------|----------|----------|-----------|----------|----------|-----------|-----------|----------|-----------|-----------|----------|
| 518368    | PARM1    | 9.17     | 617625    | RBM43    | 1.25     | 112445390 | TNFRSF10A | 1.11     | 617105    | EEF1E1    | 1.14     |
| 787099    | ZCCHC2   | 1.90     | 504467    | SASS6    | 1.19     | 282005    | PROCR     | 1.94     | 767904    | MGC126945 | 2.33     |
| 618409    | IRF4     | 6.73     | 522632    | TRIM14   | 1.61     | 787696    | TOP2A     | 1.04     | 539960    | STX11     | 1.21     |
| 527214    | PLA2G12A | 1.31     | 353510    | IFITM1   | 4.47     | 512905    | APOL2     | 2.46     | 533681    | TMEM156   | 2.21     |
| 281983    | PLAUR    | 1.30     | 507917    | HLA-A    | 1.1      | 786701    | MUC4      | 2.96     | 615277    | them4     | 1.08     |
| 533089    | CENPF    | 1.43     | 112444847 | IFITM1   | 4.69     | 514346    | SDS       | 1.95     | 512637    | ADGRF1    | 1.25     |
| 535202    | SLCO5A1  | 1.64     | 281375    | SERPINE1 | 1.03     | 782472    | CGAS      | 3.14     | 281970    | PDE1B     | 1.49     |
| 510697    | IFI35    | 1.37     | 540142    | FOXS1    | 6.48     | 782690    | Tcf7      | 1.04     | 516949    | GBP5      | 3.75     |
| 526873    | CAMK1D   | 1.15     | 526945    | ARHGAP19 | 1.93     | 534697    | KLHL7     | 1.37     | 526331    | GALNT16   | 1.28     |
| 785790    | LEKR1    | 2.66     | 282299    | PAFAH2   | 1.51     | 538529    | SLC25A28  | 1.54     | 282127    | ZFP36     | 1.02     |
| 531022    | TRIM38   | 1.21     | 788334    | APOL2    | 2.43     | 508271    | DSN1      | 1.14     | 529660    | OAS2      | 9.62     |
| 513497    | CDKN1A   | 1.17     | 539606    | PYCR1    | 1.41     | 527854    | KIF20A    | 1.50     | 539274    | AKNA      | 1.24     |
| 537810    | AKAP6    | 2.08     | 504400    | RBCK1    | 1.18     | 506932    | CHST1     | 1.96     | 512133    | DCSTAMP   | 1.25     |
| 100140338 | SP100    | 6.39     | 614212    | LMO4     | 1.1      | 533338    | BCL2L12   | 1.18     | 282369    | SLC7A5    | 1.41     |
| 514701    | Fam3b    | 6.41     | 101904723 | CCDC194  | 5.18     | 509161    | DLGAP5    | 1.49     | 540206    | MASTL     | 2.47     |
| 787488    | AFF3     | 1.60     | 281193    | GJA1     | 2.56     | 534910    | CD200     | 1.44     | 407121    | NEB       | 1.13     |
| 521254    | BPNT1    | 1.26     | 507439    | NMUR2    | 3.13     | 541166    | Etv5      | 1.84     | 280840    | LIF       | 1.11     |
| 505991    | CHAC1    | 2.79     | 504225    | AKIP1    | 1.04     | 518030    | TAF4B     | 1.85     | 104968609 | Slc9c1    | 4.25     |
| 533862    | PAPD4    | 1.14     | 515697    | APOL2    | 3.45     | 528939    | FAM160A1  | 1.11     | 100850276 | ULBP3     | 1.96     |
| 540135    | Phlda1   | 1.40     | 509471    | UBE2L6   | 2.42     | 505316    | MISP      | 1.29     | 785576    | FGF21     | 3.7      |
| 519922    | OAS1Z    | 9.48     | 282099    | TREX1    | 1.64     | 508763    | TFPI      | 1.23     | 516599    | TRIM5     | 3.44     |
| 788454    | MAGEB4   | 2.09     | 531254    | COL24A1  | 1.01     | 540874    | DEPDC1B   | 1.21     | 282855    | PCK1      | 3.92     |
| 541284    | MBOAT1   | 1.23     | 282589    | HSD11B1  | 1.24     | 782542    | ONECUT2   | 1.09     | 613705    | Rbmx2     | 1.04     |
| 511037    | TMPRSS2  | 2.36     | 510276    | RASSF1   | 1.29     | 512660    | SEMA3C    | 1.06     | 100336228 | FAM71E2   | 1.67     |
| 507550    | Stra6l   | 1.77     | 533724    | ZUFSP    | 1.08     | 509780    | PRICKLE3  | 1.43     | 784362    | SCEL      | 1.48     |

| Gene-ID   | Symbol   | log2(fc) | Gene-ID   | Symbol   | log2(fc) | Gene-ID   | Symbol  | log2(fc) | Gene-ID   | Symbol  | log2(fc) |
|-----------|----------|----------|-----------|----------|----------|-----------|---------|----------|-----------|---------|----------|
| 512869    | RNF213   | 2.91     | 516921    | EML6     | 1.14     | 538846    | JAM2    | 1.42     | 786352    | APOL2   | 8.68     |
| 510774    | ABHD1    | 3.86     | 507960    | ARHGAP9  | 1.23     | 510699    | RND2    | 2.08     | 280847    | LUM     | 5.04     |
| 613633    | SPRED3   | 1.18     | 534781    | PBK      | 1.52     | 614322    | RUNDC3A | 1.47     | 282363    | SLC6A2  | 2.55     |
| 614675    | PDLIM1   | 1.33     | 616503    | Rras     | 1.07     | 282043    | RPE65   | 1.76     | 533161    | KIF2C   | 1.2      |
| 767910    | PLAC8    | 9.43     | 281386    | SERPINF1 | 3.72     | 281667    | CCNA2   | 1.19     | 507731    | CDC25C  | 1.09     |
| 615030    | IL15RA   | 1.16     | 100295656 | Gm525    | 1.64     | 508043    | PTTG1   | 1.39     | 521399    | FAM83A  | 1.10     |
| 504932    | TMEM190  | 1.32     | 112443864 | MICA     | 1.65     | 507498    | CKAP2L  | 1.41     | 615226    | GRIK2   | 1.06     |
| 517232    | RECK     | 1.63     | 516769    | A2ML1    | 1.25     | 788414    | ESRP1   | 1.13     | 524925    | TTK     | 1.10     |
| 281346    | NCF2     | 1.61     | 327679    | CCNB1    | 1.18     | 518597    | MAB21L3 | 1.12     | 540846    | ETV1    | 2.65     |
| 783855    | TIFA     | 2.39     | 539998    | FBXO33   | 1.06     | 506740    | ESPL1   | 1.06     | 531747    | ADCY10  | 1.08     |
| 538771    | KIF5C    | 5.79     | 515376    | CDC20    | 1.45     | 510523    | TMEM154 | 1.03     | 507988    | CYP3A24 | 1.93     |
| 537688    | Prps2    | 1.04     | 511654    | CHAF1B   | 1.34     | 101906312 | HAVCR2  | 1.34     | 281702    | CNGB1   | 5.13     |
| 613606    | AKAP7    | 1.68     | 414922    | CLDN1    | 1.52     | 509786    | BCL2L15 | 3.92     | 529166    | CBLN3   | 2.28     |
| 617456    | HJURP    | 1.36     | 539780    | NAIP     | 1.03     | 533834    | CD274   | 3.87     | 504585    | SPAG5   | 1.37     |
| 537027    | BUB1B    | 1.03     | 613954    | RAB37    | 1.68     | 538521    | TGM7    | 4.35     | 505078    | APOL3   | 4.25     |
| 528870    | NAV3     | 1.06     | 616942    | HLA-A    | 1.17     | 768028    | BEX2    | 1.06     | 539464    | PCDH18  | 1.16     |
| 282521    | SERPINE2 | 1.04     | 280712    | ADA      | 1.1      | 281797    | GNGT2   | 9.26     | 280826    | IL6     | 1.19     |
| 505886    | IQGAP3   | 1.08     | 282161    | CACNB4   | 1.18     | 617024    | E2F2    | 1.21     | 281357    | NPR2    | 2.089    |
| 539153    | SLC16A14 | 1.83     | 281376    | SERPINB2 | 9.94     | 618737    | BST2    | 8.24     | 504282    | PLK3    | 1.25     |
| 616194    | HSPB11   | 1.25     | 504437    | AURKA    | 1.42     | 527651    | WDR25   | 1.50     | 281668    | CCNB2   | 1.04     |
| 526279    | CASP7    | 1.33     | 505791    | TROAP    | 1.41     | 786852    | CIT     | 1.14     | 104968404 | Nat6    | 2        |
| 100296226 | PMAIP1   | 3.77     | 527397    | DEPDC1   | 1.06     | 613895    | TEX30   | 1.01     | 530913    | APH1B   | 1.2      |
| 533985    | RHBDD1   | 1.43     | 100337356 | NAALADL2 | 1.22     | 768246    | Fbxo16  | 1.25     | 614434    | CDCA3   | 1.17     |
| 506962    | UBE2C    | 1.41     | 523367    | SHCBP1   | 1.51     | 618412    | Dusp15  | 1.16     | 408005    | HEY1    | 1.24     |
| 534849    | ASPM     | 1.31     | 407998    | F11      | 1.81     | 616028    | NUSAP1  | 1.05     | 529868    | TICRR   | 1.3      |

| Gene-ID   | Symbol  | log2(fc) | Gene-ID   | Symbol     | log2(fc) | Gene-ID | Symbol  | log2(fc) | Gene-ID   | Symbol  | log2(fc) |
|-----------|---------|----------|-----------|------------|----------|---------|---------|----------|-----------|---------|----------|
| 785408    | ZFP28   | 1.18     | 786516    | CRB2       | 1.35     | 506390  | EXO1    | 1.09     | 539741    | RNASE13 | 2.34     |
| 100298064 | HAVCR1  | 1.74     | 616063    | MYADM      | 3.30     | 521656  | CYP2J2  | 2.02     | 790225    | MLKL    | 1.94     |
| 101903126 | GVINP1  | 1.75     | 530407    | Neto1      | 1.95     | 530961  | BARD1   | 1.14     | 531014    | SPTBN5  | 1.70     |
| 781710    | GBP2    | 9.31     | 514203    | GHSR       | 4.91     | 531482  | MORN3   | 1.1      | 516073    | THEM6   | 1.11     |
| 281004    | APOE    | 2.22     | 525750    | TTC32      | 1.30     | 518795  | SOCS1   | 1.3      | 615857    | PRR11   | 1.28     |
| 518752    | ARG2    | 1.01     | 525027    | PINX1      | 1.13     | 528149  | CHSY3   | 1.53     | 538515    | FAM107A | 1.05     |
| 618289    | ZNF267  | 1.25     | 539573    | MEIS2      | 1.87     | 505080  | TGM3    | 3.35     | 615288    | SELENOV | 1.47     |
| 515741    | CAPN14  | 2.42     | 615922    | Ccdc136    | 1.38     | 526769  | PTPN11  | 1.77     | 101904203 | C4orf54 | 3.91     |
| 525695    | LVRN    | 2.78     | 100336572 | ARSH       | 1.01     | 517588  | GLI1    | 1.04     | 281535    | TLR3    | 1.06     |
| 616148    | LBH     | 3.14     | 511170    | KIF18B     | 1.51     | 540455  | PIMREG  | 1.55     | 104968627 | FSIP2   | 2.86     |
| 781494    | MYADM   | 2.14     | 108771180 | APOBEC3H   | 1.29     | 510973  | NUMBL   | 1.10     | 526515    | ARMC4   | 1.82     |
| 107132081 | MAGEB2  | 1.28     | 327703    | CACNB1     | 1.07     | 509575  | JAML    | 3.32     | 506708    | RADIL   | 1.19     |
| 613724    | DYNC1I1 | 1.17     | 281914    | MMP13      | 3        | 508394  | CASQ1   | 1.20     | 100336077 | PRSS48  | 1.66     |
| 617315    | FAM217A | 5.75     | 514971    | Cyp2s1     | 1.98     | 508153  | MYADM   | 2.61     | 540145    | FBXO43  | 1.12     |
| 514463    | TEKT2   | 1.59     | 450212    | RXFP4      | 1.70     | 281904  | LOXL4   | 1.87     | 615282    | CDKN3   | 1.55     |
| 787891    | CCDC187 | 1.08     | 781188    | MRAP2      | 8.80     | 506294  | KIF22   | 1.07     | 523830    | GAL3ST2 | 6.41     |
| 613605    | KCNQ5   | 2.83     | 100301478 | CCNB3      | 1.43     | 539571  | ESM1    | 1.29     | 107132327 | CYP2J2  | 4.86     |
| 337925    | SLC8A1  | 2.47     | 523998    | NEK2       | 1.21     | 517231  | RUBCNL  | 1.58     | 539935    | GJB3    | 1.20     |
| 518234    | STAC3   | 1.25     | 788092    | DNAH17     | 3.7      | 616082  | DUPD1   | 2.12     | 509065    | RGSL1   | 1.44     |
| 101907121 | RTL4    | 1.21     | 512408    | RAD21L1    | 1.36     | 615438  | BTBD19  | 1.12     | 515679    | NUGGC   | 3.77     |
| 532898    | TNS4    | 1.81     | 507688    | GLDC       | 1.1      | 617445  | KAZALD1 | 1.42     | 534432    | CCDC39  | 2.7      |
| 100336873 | LAMA3   | 1.86     | 781721    | C16H1orf21 | 1.4      | 614840  | GAS2    | 1.55     | 618054    | PROM1   | 2.91     |
| 100336423 | Oscar   | 3.97     | 616965    | FAM72A     | 1.96     | 407133  | TACR1   | 2.58     | 786258    | RAN     | 2.58     |
| 286849    | CD40    | 1.51     | 101906350 | CCDC168    | 1.05     | 514509  | AGMAT   | 1.71     | 522726    | NT5DC4  | 1.74     |
| 540119    | MCHR1   | 2.52     | 613414    | TRH        | 1.02     | 526674  | MYH15   | 2.25     | 518896    | ADD2    | 1.02     |

| Gene-ID   | Symbol   | log2(fc) | Gene-ID     | Symbol               | log2(fc) | Gene-ID     | Symbol | log2(fc) | Gene-ID    | Symbol | log2(fc) |
|-----------|----------|----------|-------------|----------------------|----------|-------------|--------|----------|------------|--------|----------|
| 616691    | CATSPERE | 4.81     | 281174      | FUT1                 | 3.73     | MSTRG.10329 | --     | 2.96     | MSTRG.2885 | --     | 1.03     |
| 541135    | Kif15    | 1.05     | 101904283   | LY6L                 | 1.09     | MSTRG.5305  | --     | 1.63     | MSTRG.6476 | --     | 1.97     |
| 516291    | Rec8     | 3.86     | 112445660   | IFNT1                | 1.33     | 112446427   | --     | 1.98     | MSTRG.891  | --     | 2.2      |
| 101903854 | Spef1    | 1.21     | 520341      | TNFRSF9              | 2.38     | MSTRG.13667 | --     | 1.65     | MSTRG.8192 | --     | 1.3      |
| 520712    | C22orf23 | 1        | 503554      | COX6B2               | 2.33     | 107132617   | --     | 2.77     | MSTRG.7959 | --     | 1.80     |
| 533129    | ETV4     | 2.06     | 526230      | Cp                   | 1.17     | MSTRG.5856  | --     | 2.66     | MSTRG.8704 | --     | 1.34     |
| 507646    | Tm4sf4   | 2.47     | 281644      | BFSP1                | 1.27     | MSTRG.536   | --     | 11.35    | 112448863  | --     | 2.73     |
| 789769    | SH2D5    | 1.38     | 506132      | CH25H                | 1.58     | MSTRG.14369 | --     | 1.44     | 112449284  | --     | 1.53     |
| 522763    | MYADM    | 3.12     | 616348      | ARL14EPL             | 1.97     | MSTRG.3683  | --     | 1.19     | 112442374  | --     | 1.46     |
| 280969    | ABAT     | 1.76     | 526745      | fer-1-like protein 4 | 1.71     | MSTRG.7203  | --     | 1.27     | 112447334  | --     | 3.28     |
| 506315    | Dnm3     | 1.18     | 783920      | .GTPase 1-like       | 3.94     | MSTRG.9440  | --     | 1.47     | MSTRG.8425 | --     | 1.37     |
| 511034    | TMEM108  | 1.52     | MSTRG.3546  | pol                  | 1.63     | MSTRG.4762  | --     | 1.18     | MSTRG.3025 | Pol    | 1.73     |
| 783508    | ULBP2    | 1.56     | MSTRG.12357 | Patr-A               | 1.95     | MSTRG.13619 | --     | 5        | MSTRG.7765 | pol    | 1.55     |
| 504548    | UBD      | 1.90     | MSTRG.7126  | gag-pro-pol          | 1.06     | 101903477   | --     | 1.28     |            |        |          |
| 281204    | GNG3     | 1.39     | MSTRG.13657 | NCR3LG1              | 2.74     | MSTRG.7465  | --     | 1.50     |            |        |          |

Annotation: log2(fc) means the log2 (fold change).
